# Supplementary material
Source: PubMed Central journal article supplement (PMC2902814)
Supplement: djp499_1.pdf [file djp499_1.pdf]

**Supplementary Table 1.** Short tandem repeat (STR) profile, based on eight STR loci (number of repeats at each locus is indicated), of the original tissues from which the cell lines were derived\*

| Primary tissue | Short tandem repeat locus |        |         |        |       |            |        |        |
|----------------|---------------------------|--------|---------|--------|-------|------------|--------|--------|
|                | D21S11                    | TH01   | D3S1358 | FGA    | TPOX  | D8S1179    | vWA    | D5S818 |
| FLO-1          | 30, 32.2                  | 6, 9.3 | 15      | 21     | 9, 11 | 13         | 16     | 12, 14 |
| KYAE-1         | NA                        | 6, 9   | 15, 16  | 18     | 8     | NA         | 14     | 10, 13 |
| OE19           | 28, 30                    | 8, 9   | 15, 18  | 23, 26 | 8     | 13, 15     | 17, 18 | 11, 14 |
| OE33           | NA                        | 7, 8   | 18      | 22, 23 | 8, 11 | 10, 12     | 14, 17 | 11     |
| OACM5.1        | NA                        | 6, 9.3 | 16, 17  | 22     | 8     | 13, 14     | 19     | 12     |
| OACP4C         | NA                        | 6, 9   | 14, 18  | 20     | 9, 11 | 13, 14     | 16     | 9, 12  |
| SK-GT-4        | NA                        | 6, 9.3 | 16, 17  | 22, 23 | 8, 10 | NA         | 17     | 12     |
| JH-EsoAd1*     | NA                        | 6, 7   | NA      | NA     | 8, 9  | NA         | 18, 19 | 11     |
| ESO26          | 30, 31.2                  | 9      | 15      | 21     | 7, 9  | 13, 14     | 14, 18 | 11, 12 |
| ESO51          | 30, 33.2                  | 9      | 15, 16  | 21, 22 | 8, 11 | 10, 11, 12 | 14, 15 | 11, 13 |

\*JH-EsoAd1 repeat number at additional STR loci; CSF1PO: 9, 10; Amelogenin: X, Y; D13S317: 11; D16S539: 10, 12; D7S820: 10, 12. NA = no available data due to technical failure.
