# Supplementary material
Source: PubMed Central journal article supplement (PMC2902814)
Supplement: djp499_2.pdf [file djp499_2.pdf]

**Supplementary Table 2.** Short tandem repeat (STR) profile based on eight STR loci (number of repeats at each locus is indicated) and *TP53* mutations in the original tissues from which the cell lines SK-GT-2 and SK-GT-5 were derived\*

| Primary tissue | Short tandem repeat locus |      |         |        |       |         |        |        | <i>TP53</i> mutation |
|----------------|---------------------------|------|---------|--------|-------|---------|--------|--------|----------------------|
|                | D21S11                    | TH01 | D3S1358 | FGA    | TPOX  | D8S1179 | vWA    | D5S818 |                      |
| SK-GT-2        | 29, 32.2                  | 8, 9 | 15, 17  | 25, 26 | 9, 12 | 13, 15  | 15, 18 | 10, 12 | c.524G>A             |
| SK-GT-5        | 28, 32.2                  | 9    | 15, 17  | 21, 22 | 7, 8  | 10, 13  | 17     | 12     | c.916C>T             |

\*The currently used EAC cell line SK-GT-5 (see supplementary table 1) is in fact the gastric fundus carcinoma cell line SK-GT-2. *TP53* mutations according Genbank accession number AF307851.1
