# Supplementary material
Source: PubMed Central journal article supplement (PMC2902814)
Supplement: djp499_3.pdf [file djp499_3.pdf]

**Supplementary Table 3.** Clinical characteristics of verified human esophageal adenocarcinoma cell lines\*

| Characteristic         | Esophageal adenocarcinoma cell line |                  |               |               |                       |               |               |               |               |               |
|------------------------|-------------------------------------|------------------|---------------|---------------|-----------------------|---------------|---------------|---------------|---------------|---------------|
|                        | FLO-1                               | KYAE-1           | OE19          | OE33          | OACM5.1               | OACP4C        | SK-GT-4       | JH-EsoAd1     | ESO26         | ESO51         |
| <i>Patient</i>         |                                     |                  |               |               |                       |               |               |               |               |               |
| Sex                    | male                                | male             | male          | female        | female                | male          | male          | male          | male          | male          |
| Age                    | 68                                  | 60               | 72            | 73            | 47                    | 55            | 89            | 66            | 56            | 74            |
| Ethnicity              | white                               | asian            | white         | white         | white                 | white         | white         | white         | white         | white         |
| Neoadjuvant treatment  | no                                  | CTX/RTX          | no            | no            | no                    | no            | no            | no            | no            | no            |
| <i>Tumor</i>           |                                     |                  |               |               |                       |               |               |               |               |               |
| Barrett Tumor location | no                                  | no               | no            | yes           | yes                   | no            | yes           | yes           | no            | yes           |
| Nodal involvement      | distal EAC                          | distal EAC       | cardia AC     | distal EAC    | distal EAC            | cardia AC     | distal EAC    | distal EAC    | cardia AC     | distal EAC    |
| Distant metastases     | yes                                 | yes              | yes           | no            | yes                   | yes           | yes           | no            | yes           | yes           |
| pTNM                   | no                                  | yes (lung)       | unknown       | unknown       | yes (pleura)          | yes (pleura)  | unknown       | unknown       | yes (pleura)  | unknown       |
|                        | pT2N1M0                             | pT4N1M1          | pT3N1Mx       | pT3N0Mx       | pT3N1M1               | pT3N1M1       | T2N1Mx        | pT3N0Mx       | pT4N1M1       | pT3N1Mx       |
| <i>Cell line</i>       |                                     |                  |               |               |                       |               |               |               |               |               |
| Year of establishment  | 1991                                | 2001             | 1993          | 1993          | 1996                  | 1996          | 1989          | 1997          | 2000          | 2000          |
| Site of origin         | primary tumor                       | pleural effusion | primary tumor | primary tumor | metastatic lymph node | primary tumor |
| Xenograft              | no                                  | yes              | yes           | yes           | yes                   | yes           | yes           | yes           | yes           | yes           |
| <i>TP53</i> mutation   | c.830G>T                            | c.455C>T         | c.929dupA     | c.404G>A      | c.164delC             | c.574C>T      | c.298C>T      | c.797G>A      | c.742C>T      | c.524G>A      |
|                        |                                     |                  |               |               | c.743G>A              |               |               |               |               |               |

\*Identical *TP53* mutations (Genbank accession number AF307851.1) were observed in all cell lines and their corresponding primary tissues. CTX/RTX = chemoradiotherapy; distal EAC = distal esophageal adenocarcinoma; Cardia AC = cardia adenocarcinoma.
