# Supplementary material
Source: PubMed Central journal article supplement (PMC2902814)
Supplement: djp499_4.pdf [file djp499_4.pdf]

**Supplementary Table 4.** Reports in which only cell lines SEG-1 and/or BIC-1 have been used, without esophageal adenocarcinoma (EAC) cell lines, and or human tissues\*

| Authors                 | Publication date | Cell line(s) | Esophagus related cell line(s) | Other cell line(s)  | Xenograft    | Study title                                                                                                                                  |
|-------------------------|------------------|--------------|--------------------------------|---------------------|--------------|----------------------------------------------------------------------------------------------------------------------------------------------|
| Avissar et al.          | 2009             | SEG-1        |                                |                     |              | Bile acid or in combination with acid induces CDX2 expression through activation of the EGFR                                                 |
| Wang et al.             | 2008             | SEG-1        |                                |                     |              | TAE226, a dual inhibitor for FAK and IGF-IR, has inhibitory effects on mTOR signaling in EA cells                                            |
| Delgado et al.          | 2008             | SEG-1        |                                |                     |              | Sorafenib triggers antiproliferative and pro-apoptotic signals in human EA cells                                                             |
| Wu et al.               | 2008             | SEG-1        |                                |                     |              | Deoxycholic acid induces the overexpression of intestinal mucin, MUC2, via NF-kB signaling pathway in human EA cells                         |
| Sun et al.              | 2008             | SEG-1        | ECA-109                        |                     |              | Antiproliferation and apoptosis induction of paeonol in human esophageal cancer cell lines                                                   |
| Pataer et al.           | 2008             | SEG-1; BIC-1 |                                | A549; H1299         |              | Adenoviral endoplasmic reticulum-targeted mda-7/interleukin-24 vector enhances human cancer cell killing                                     |
| Keswani et al.          | 2008             | SEG-1        |                                |                     |              | Sorafenib inhibits MAPK-mediated proliferation in a Barrett esophageal adenocarcinoma                                                        |
| Zhang et al.            | 2008             | SEG-1        | TE-2                           |                     |              | Treatment of radioresistant stem-like esophageal cancer cells by an apoptotic gene-armed, telomerase-specific oncolytic adenovirus           |
| Kresty et al.           | 2008             | SEG-1        |                                |                     |              | Cranberry proanthocyanidins induce apoptosis and inhibit acid-induced proliferation of human esophageal adenocarcinoma cells                 |
| McFadden et al.         | 2008             | SEG-1; BIC-1 |                                |                     |              | Corn-derived carbohydrate inositol hexaphosphate inhibits Barrett adenocarcinoma growth by pro-apoptotic mechanisms                          |
| Wang et al.             | 2008             | SEG-1        |                                | NIH3T3              | SEG-1/NIH3T3 | The adenocarcinoma-associated antigen, AGR2, promotes tumor growth, cell migration, and cellular transformation                              |
| Si et al.               | 2008             | SEG-1        |                                |                     |              | STAT5 mediates PAF-induced NADPH oxidase NOX5-S expression in Barrett esophageal adenocarcinoma cells                                        |
| Baguma-Nibasheka et al. | 2007             | SEG-1; BIC-1 |                                |                     |              | Selective cyclooxygenase-2 inhibition suppresses basic fibroblast growth factor expression in human esophageal adenocarcinoma                |
| Levy et al.             | 2007             | SEG-1        |                                | HaCaT; 293T; NIH3T3 |              | Arkadia activates Smad3/Smad4-dependent transcription by triggering signal-induced SnoN degradation                                          |
| Hu et al.               | 2007             | SEG-1        | HET-1A ; HKESC-1; HKESC-2      |                     |              | The pathogenesis of Barrett esophagus: secondary bile acids upregulate intestinal differentiation factor CDX2 expression in esophageal cells |

|                        |      |                |                                 |                           |                                                                                                                                                                                  |
|------------------------|------|----------------|---------------------------------|---------------------------|----------------------------------------------------------------------------------------------------------------------------------------------------------------------------------|
| Hu et al.              | 2007 | SEG-1          | HET-1A ;<br>HKESC-1;<br>HKESC-2 |                           | Pathogenesis of Barrett esophagus: deoxycholic acid up-regulates goblet-specific gene MUC2 in concert with CDX2 in human esophageal cells                                        |
| Dvorak et al.*         | 2007 | SEG-1          | HET-1A;<br>CP-D                 |                           | Bile acids in combination with low pH induce oxidative stress and oxidative DNA damage: relevance to the pathogenesis of Barrett esophagus                                       |
| Si et al.              | 2007 | SEG-1          | hTERT<br>NSE                    |                           | NADPH oxidase NOX5-S mediates acid-induced cyclooxygenase-2 expression via activation of NF-kappaB in Barrett esophageal adenocarcinoma cells                                    |
| Chao et al.            | 2007 | SEG-1          |                                 | SEG-1                     | 3'-deoxy-3'-(18)F-fluorothymidine (FLT) positron emission tomography for early prediction of response to chemoradiotherapy-a clinical application model of esophageal cancer     |
| Dvorak et al.          | 2006 | SEG-1          | HET-1A                          |                           | Esophageal acid exposure at pH < or = 2 is more common in Barrett esophagus patients and is associated with oxidative stress                                                     |
| Raju et al.            | 2006 | SEG-1          |                                 |                           | Improvement of esophageal adenocarcinoma cell and xenograft responses to radiation by targeting cyclin-dependent kinases                                                         |
| Apisarnthanarax et al. | 2006 | SEG-1          |                                 |                           | Early detection of chemoradioresponse in esophageal carcinoma by 3'-deoxy-3'-3H-fluorothymidine using preclinical tumor models                                                   |
| Fu et al.              | 2006 | SEG-1          | HET-1A                          |                           | cAMP-response element-binding protein mediates acid-induced NADPH oxidase NOX5-S expression in Barrett esophageal adenocarcinoma cells                                           |
| Li et al.              | 2006 | SEG-1; BIC-1   |                                 |                           | Enhanced sensitivity to chemotherapy in esophageal cancer through inhibition of NF-kappaB                                                                                        |
| Jaiswal et al.         | 2006 | SEG-1          | hTERT<br>NSE                    |                           | Bile salt exposure increases proliferation through p38 and ERK MAPK pathways in a non-neoplastic Barrett cell line                                                               |
| Kassis et al.          | 2006 | SEG-1; SK-GT-5 |                                 | A549; CALU-6;H2373; H2052 | Depletion of DNA methyltransferase 1 and/or DNA methyltransferase 3b mediates growth arrest and apoptosis in lung and esophageal cancer and malignant pleural mesothelioma cells |
| Sarosi et al.          | 2005 | SEG-1          |                                 |                           | Acid increases MAPK-mediated proliferation in Barrett esophageal adenocarcinoma cells via intracellular acidification through a Cl-/HCO3-exchanger                               |
| von Holzen et al.      | 2005 | SEG-1; BIC-1   | TT                              |                           | Role for the double-stranded RNA-activated protein kinase PKR in Ad-TNF-alpha gene therapy in esophageal cancer                                                                  |
| Shammas et al.         | 2005 | SEG-1          |                                 |                           | Telomerase inhibition by siRNA causes senescence and apoptosis in Barrett adenocarcinoma cells: mechanism and therapeutic potential                                              |
| Vona-Davis et al.      | 2005 | SEG-1; BIC-1   |                                 |                           | MAPK and PI3K inhibition reduces proliferation of Barrett adenocarcinoma in vitro                                                                                                |
| Vona-Davis et al.      | 2004 | SEG-1          |                                 |                           | Proteomic analysis of SEG-1 human Barrett's-associated esophageal adenocarcinoma cells treated with keyhole limpet hemocyanin                                                    |

|                   |      |              |                       |                               |                  |                                                                                                                                                          |
|-------------------|------|--------------|-----------------------|-------------------------------|------------------|----------------------------------------------------------------------------------------------------------------------------------------------------------|
| McFadden et al.   | 2004 | SEG-1; BIC-1 |                       |                               |                  | Peptide YY inhibits the growth of Barrett esophageal adenocarcinoma in vitro                                                                             |
| Souza et al.      | 2004 | SEG-1        |                       |                               |                  | Acid increases proliferation via ERK and p38 MAPK-mediated increases in cyclooxygenase-2 in Barrett adenocarcinoma cells                                 |
| Torquati et al.   | 2004 | SEG-1        |                       |                               |                  | RUNX3 inhibits cell proliferation and induces apoptosis by reinstating transforming growth factor beta responsiveness in esophageal adenocarcinoma cells |
| Jaiswal et al.    | 2004 | SEG-1        |                       |                               |                  | Bile salt exposure causes phosphatidyl-inositol-3-kinase-mediated proliferation in a Barrett adenocarcinoma cell line                                    |
| Moore et al.      | 2004 | SEG-1; BIC-1 | SK-GT-4               | AGS-B;<br>AR42J; CHO;<br>GB   |                  | Gastrin stimulates receptor-mediated proliferation of human esophageal adenocarcinoma cells                                                              |
| Vona-Davis et al. | 2004 | SEG-1; BIC-1 | KYSE-150;<br>KYSE-410 |                               |                  | Antiproliferative and apoptotic effects of rofecoxib on esophageal cancer in vitro                                                                       |
| Shammas et al.    | 2004 | SEG-1; BIC-1 |                       |                               |                  | Growth arrest, apoptosis, and telomere shortening of Barrett's-associated adenocarcinoma cells by a telomerase inhibitor                                 |
| Morgan et al.     | 2004 | SEG-1        |                       |                               |                  | In vitro acid exposure has a differential effect on apoptotic and proliferative pathways in a Barrett adenocarcinoma cell line                           |
| Somasundar et al. | 2003 | SEG-1; BIC-1 |                       |                               |                  | Leptin stimulates esophageal adenocarcinoma growth by nonapoptotic mechanisms                                                                            |
| McFadden et al.   | 2003 | SEG-1; BIC-1 |                       |                               |                  | Keyhole limpet hemocyanin, a novel immune stimulant with promising anticancer activity in Barrett esophageal adenocarcinoma                              |
| Joe et al.        | 2003 | SEG-1; BIC-1 | HCE-7                 |                               |                  | Exisulind and CP248 induce growth inhibition and apoptosis in human esophageal adenocarcinoma and squamous carcinoma cells                               |
| Gupta et al.      | 2003 | SEG-1; BIC-1 |                       |                               |                  | Selective gene expression using a DF3/MUC1 promoter in a human esophageal adenocarcinoma model                                                           |
| Gupta et al.      | 2002 | SEG-1        |                       |                               | SEG-1            | Combined gene therapy and ionizing radiation is a novel approach to treat human esophageal adenocarcinoma                                                |
| Joe et al.        | 2002 | SEG-1; BIC-1 |                       | SW480;<br>MCF7;<br>HCE7; HL60 |                  | Resveratrol induces growth inhibition, S-phase arrest, apoptosis, and changes in biomarker expression in several human cancer cell lines                 |
| Mauceri et al.    | 2001 | SEG-1        | SQ-20B                |                               | SEG-1;<br>SQ-20B | Treatment of head and neck and esophageal xenografts employing Alimta and concurrent ionizing radiation                                                  |
| Fang et al.       | 2001 | BIC-1        |                       |                               |                  | Translocation breakpoints in FHIT and FRA3B in both homologs of chromosome 3 in an esophageal adenocarcinoma                                             |
| Salloum et al.    | 2000 | SEG-1        | SQ-20B                | LLC; U373<br>MG               | U373 MG          | NM-3, an isocoumarin, increases the antitumor effects of radiotherapy without toxicity                                                                   |
| Gorski et al.     | 1999 | SEG-1        | SQ-20B                | LLC; U1                       | SEG-1            | Blockage of the vascular endothelial growth factor stress response increases the antitumor effects of ionizing radiation                                 |

\* Also human tissue samples were used. Esophagus related cell lines are HET-1A (Non-cancer derived, SV40 immortalized squamous epithelial cell line established by Harris et al.); hTERT NSE (hTERT immortalized squamous epithelial cell line established by Spechler et al.); CP-A; CP-C; CP-D (hTERT immortalized Barrett esophagus derived cell lines established by Rabinovitch et al.). Esophageal squamous cell carcinoma cell lines are the KYSE-series; TE-series; ECA-109; HKESC-1; HKESC-2; TT; HCE-7; SQ-20B.
