# Supplementary material
Source: PubMed Central journal article supplement (PMC2902814)
Supplement: djp499_5.pdf [file djp499_5.pdf]

**Supplementary Table 5.** Reports in which SEG-1 and or BIC-1 have been used in combination with other esophageal adenocarcinoma cell lines and or human tissues\*

| Authors           | Publication date | Cell line(s) | EAC cell line(s)                                                 | Esophagus related cell lines           | Patient tissue samples | Study title                                                                                                                                                                                        |
|-------------------|------------------|--------------|------------------------------------------------------------------|----------------------------------------|------------------------|----------------------------------------------------------------------------------------------------------------------------------------------------------------------------------------------------|
| Beales et al.     | 2009             | BIC-1        | OE33                                                             | CP-?                                   |                        | Glycine-extended gastrin inhibits apoptosis in Barrett esophageal and EA cells through JAK2/STAT3 activation                                                                                       |
| van Dekken et al. | 2008             | SEG-1        | OE19; OE33; BE-3; ESO51; KYAE-1; P4CE; OACM5.1; SK-GT-4; SK-GT-5 |                                        | EAC; GAC               | Molecular dissection of the chromosome band 7q21 amplicon in gastroesophageal junction adenocarcinomas identifies cyclin-dependent kinase 6 at both genomic and protein expression levels          |
| Shammas et al.†   | 2008             | SEG-1; BIC-1 | FLO-1                                                            |                                        | Normal; Barrett; EAC   | Telomere maintenance in laser capture microdissection-purified Barrett adenocarcinoma cells and effect of telomerase inhibition in vivo                                                            |
| Boult et al.      | 2008             | SEG-1        |                                                                  |                                        | Barrett; EAC           | Oesophageal adenocarcinoma is associated with a deregulation in the MYC/MAX/MAD network                                                                                                            |
| Breton et al.     | 2008             | SEG-1; BIC-1 | FLO-1; OE33                                                      | KYSE-30; OE21; HET1A; CP-A; CP-C; CP-D |                        | Proteomic screening of a cell line model of esophageal carcinogenesis identifies cathepsin D and aldo-keto reductase 1C2 and 1B10 dysregulation in Barrett esophagus and esophageal adenocarcinoma |
| Ogunwobi et al.*  | 2008             | BIC-1        | FLO-1; OE33; OE19                                                |                                        |                        | Globular adiponectin, acting via adiponectin receptor-1, inhibits leptin-stimulated oesophageal adenocarcinoma cell proliferation                                                                  |
| Ogunwobi et al.   | 2008             | BIC-1        | OE33                                                             |                                        |                        | Statins inhibit proliferation and induce apoptosis in Barrett esophageal adenocarcinoma cells                                                                                                      |
| Yen et al.        | 2008             | SEG-1        | BE-3; SK-GT-4                                                    | CP-A; CP-C                             |                        | Bile acid exposure up-regulates tuberous sclerosis complex 1/mammalian target of rapamycin pathway in Barrett associated esophageal adenocarcinoma                                                 |
| Jethwa et al.‡    | 2008             | SEG-1        | OE33                                                             | TE-7                                   | Normal; Barrett; EAC   | Overexpression of Slug is associated with malignant progression of esophageal adenocarcinoma                                                                                                       |
| Clément et al.‡   | 2008             | SEG-1; BIC-1 | OE19; OE33;                                                      | TE-7                                   | Normal; Barrett; EAC   | Epigenetic alteration of the Wnt inhibitory factor-1 promoter occurs early in the carcinogenesis of Barrett esophagus                                                                              |
| Boult et al.      | 2008             | SEG-1        | OE33                                                             |                                        | ESCC                   | Overexpression of cellular iron import proteins is associated with malignant progression of esophageal adenocarcinoma                                                                              |
| Watts et al.‡     | 2007             | SEG-1; BIC-1 |                                                                  | TE-7                                   | Normal; Barrett        | Identification of Fn14/TWEAK receptor as a potential therapeutic target in esophageal adenocarcinoma                                                                                               |

|                       |      |              |                                                                                |                              |                            |                                                                                                                                                                    |
|-----------------------|------|--------------|--------------------------------------------------------------------------------|------------------------------|----------------------------|--------------------------------------------------------------------------------------------------------------------------------------------------------------------|
| Zhang et al.          | 2007 | SEG-1        |                                                                                |                              | EAC                        | Alternative splicing of the FGF antisense gene: differential subcellular localization in human tissues and esophageal adenocarcinoma                               |
| Jin et al.            | 2007 | SEG-1; BIC-1 | OE33                                                                           | KYSE-series                  | EAC; ESCC                  | Hypermethylation of tachykinin-1 is a potential biomarker in human esophageal cancer                                                                               |
| van Duin et al.       | 2007 | SEG-1; BIC-1 | OE19; OE33; BE-3; ESO26; ESO51; FLO-1; KYAE-1; P4CE; OACM5.1; SK-GT-4; SK-GT-5 |                              |                            | High-resolution array comparative genomic hybridization of chromosome 8q: evaluation of putative progression markers for gastroesophageal junction adenocarcinomas |
| Jin et al.            | 2007 | SEG-1; BIC-1 | OE33                                                                           | KYSE-series                  | Normal; Barrett; EAC; ESCC | Hypermethylation of the nel-like 1 gene is a common and early event and is associated with poor prognosis in early-stage esophageal adenocarcinoma                 |
| Hao et al.‡           | 2007 | SEG-1        | OE33                                                                           | OE21; TE-7                   | Barrett                    | Gene expression changes associated with Barrett esophagus and Barrett-associated adenocarcinoma cell lines after acid or bile salt exposure                        |
| Liu et al.            | 2007 | SEG-1; BIC-1 | FLO-1; SK-G-T4; BE-3                                                           | HET-1A                       |                            | Regulation of Cdx2 expression by promoter methylation, and effects of Cdx2 transfection on morphology and gene expression of human esophageal epithelial cells     |
| Lin et al.‡           | 2006 | SEG-1; BIC-1 | FLO-1; OE33; H80-T; L20-T; BA1                                                 | HET-1A; S95-B                | Normal; Barrett; EAC       | Expression and effect of inhibition of the ubiquitin-conjugating enzyme E2C on esophageal adenocarcinoma                                                           |
| Watson et al.*        | 2006 | SEG-1; BIC-1 | FLO-1                                                                          |                              |                            | Inhibition of c-Met as a therapeutic strategy for esophageal adenocarcinoma                                                                                        |
| Sims-Mourtada et al.† | 2006 | SEG-1; BIC-1 | SK-GT-4; BE-3                                                                  |                              | EAC                        | Hedgehog: an attribute to tumor regrowth after chemoradiotherapy and a target to improve radiation response                                                        |
| Hamilton et al.       | 2006 | SEG-1; BIC-1 | OE33                                                                           | KYSE-series                  | Barrett; EAC               | Reprimo methylation is a potential biomarker of Barrett-Associated esophageal neoplastic progression                                                               |
| Rees et al.‡          | 2006 | BIC-1        | OE33                                                                           | TE-7                         | EAC                        | In vivo and in vitro evidence for transforming growth factor-beta1-mediated epithelial to mesenchymal transition in esophageal adenocarcinoma                      |
| Su et al.‡            | 2006 | SEG-1; BIC-1 | OE19                                                                           | KYSE-30; OE-21; H5E973; TE-7 |                            | Comparative genomic hybridization of esophageal adenocarcinoma and squamous cell carcinoma cell lines                                                              |
| Hao et al.‡           | 2006 | SEG-1        | OE33                                                                           | OE-21; TE-7                  | Barrett; EAC               | Gene expression profiling reveals stromal genes expressed in common between Barrett esophagus and adenocarcinoma                                                   |
| Chang et al.†         | 2006 | SEG-1        | SK-GT-5; SK-GT-4                                                               |                              |                            | Tumor-specific apoptotic gene targeting overcomes radiation resistance in esophageal adenocarcinoma                                                                |
| Lin et al.            | 2006 | SEG-1        | FLO-1                                                                          | HET-1A                       | EAC                        | Multiple forms of genetic instability within a 2-Mb                                                                                                                |

|                    |      |              |                                |                        |                      |                                                                                                                                                                                               |
|--------------------|------|--------------|--------------------------------|------------------------|----------------------|-----------------------------------------------------------------------------------------------------------------------------------------------------------------------------------------------|
| Younes et al.      | 2006 | SEG-1; BIC-1 |                                |                        | EAC                  | chromosomal segment of 3q26.3-q27 are associated with development of esophageal adenocarcinoma<br>Functional expression of TRAIL receptors TRAIL-R1 and TRAIL-R2 in esophageal adenocarcinoma |
| Watson et al.†     | 2006 | SEG-1; BIC-1 | FLO-1                          |                        |                      | Ad-IRF-1 induces apoptosis in esophageal adenocarcinoma                                                                                                                                       |
| Miller et al.      | 2006 | SEG-1; BIC-1 | FLO-1; OE33                    |                        | EAC                  | Genomic amplification of MET with boundaries within fragile site FRA7G and upregulation of MET pathways in esophageal adenocarcinoma                                                          |
| Abdalla et al.     | 2005 | SEG-1; BIC-1 | OE33                           | OE-21                  | Barrett; EAC         | Effect of inflammation on cyclooxygenase (COX)-2 expression in benign and malignant oesophageal cells                                                                                         |
| Zou et al.         | 2005 | SEG-1; BIC-1 | OE33                           |                        | Normal; Barrett; EAC | Aberrant methylation of secreted frizzled-related protein genes in esophageal adenocarcinoma and Barrett esophagus                                                                            |
| Onwuegbusi et al.‡ | 2005 | SEG-1; BIC-1 | FLO-1; OE33                    | CP-A; CP-C; CP-D; TE-7 | Barrett; EAC         | Impaired transforming growth factor beta signalling in Barrett carcinogenesis due to frequent SMAD4 inactivation                                                                              |
| Schulmann et al.   | 2005 | BIC-1        |                                |                        | Barrett; EAC         | Inactivation of p16, RUNX3, and HPP1 occurs early in Barrett-associated neoplastic progression and predicts progression risk                                                                  |
| Darnton et al.     | 2005 | SEG-1; BIC-1 | FLO-1; OE33                    |                        | EAC                  | Tissue inhibitor of metalloproteinase-3 (TIMP-3) gene is methylated in the development of esophageal adenocarcinoma: loss of expression correlates with poor prognosis                        |
| Hansel et al.      | 2005 | SEG-1; BIC-1 | KYAE-1; OE33                   |                        | Barrett; EAC         | CDC2/CDK1 expression in esophageal adenocarcinoma and precursor lesions serves as a diagnostic and cancer progression marker and potential novel drug target                                  |
| Zou et al.         | 2005 | SEG-1; BIC-1 | OE33                           |                        | Normal; Barrett; EAC | Frequent methylation of eyes absent 4 gene in Barrett esophagus and esophageal adenocarcinoma                                                                                                 |
| Mahidhara et al.   | 2005 | SEG-1; BIC-1 | FLO-1                          | HET-1A                 | EAC                  | Altered trafficking of Fas and subsequent resistance to Fas-mediated apoptosis occurs by a wild-type p53 independent mechanism in esophageal adenocarcinoma                                   |
| Herrera et al.     | 2005 | SEG-1; BIC-1 | FLO-1                          | HET-1A                 | EAC                  | The HGF receptor c-Met is overexpressed in esophageal adenocarcinoma                                                                                                                          |
| Lin et al.‡        | 2004 | SEG-1; BIC-1 | FLO-1; OE33; H80-T; L20-T; BA1 | HET-1A ; S95-B         | EAC                  | Melanoma-associated antigens in esophageal adenocarcinoma: identification of novel MAGE-A10 splice variants                                                                                   |
| Lin et al.‡        | 2004 | SEG-1; BIC-1 | FLO-1; OE33; H80-T; L20-T; BA1 | HET-1A; S95-B          | EAC                  | L-type amino acid transporter-1 overexpression and melphalan sensitivity in Barrett adenocarcinoma                                                                                            |

|                 |      |              |                  |                  |                         |                                                                                                                                                                                |
|-----------------|------|--------------|------------------|------------------|-------------------------|--------------------------------------------------------------------------------------------------------------------------------------------------------------------------------|
| Kim et al.      | 2003 | SEG-1; BIC-1 | OE33             | KYSE-?;<br>OE-21 |                         | Transforming growth factor-beta is an endogenous radioresistance factor in the esophageal adenocarcinoma cell line OE-33                                                       |
| Miller et al.   | 2003 | SEG-1; BIC-1 | FLO-1            | HET-1A           | EAC                     | Gene amplification in esophageal adenocarcinomas and Barrett with high-grade dysplasia                                                                                         |
| Souza et al.    | 2002 | SEG-1        |                  |                  | Barrett                 | Acid exposure activates the mitogen-activated protein kinase pathways in Barrett esophagus                                                                                     |
| Arlt et al.*    | 2002 | SEG-1; BIC-1 | FLO-1            |                  |                         | Molecular characterization of FRAXB and comparative common fragile site instability in cancer cells                                                                            |
| Weiser et al.   | 2001 | SK-GT-5      | BE-3             | TE-series        |                         | Induction of MAGE-3 expression in lung and esophageal cancer cells                                                                                                             |
| Souza et al.    | 2000 | SEG-1; BIC-1 | FLO-1            |                  |                         | Selective inhibition of cyclooxygenase-2 suppresses growth and induces apoptosis in human esophageal adenocarcinoma cells                                                      |
| Aggarwal et al. | 2000 | SEG-1; BIC-1 | FLO-1            |                  | Normal;<br>Barrett; EAC | Indomethacin-induced apoptosis in esophageal adenocarcinoma cells involves upregulation of Bax and translocation of mitochondrial cytochrome C independent of COX-2 expression |
| Compton et al.  | 1999 | SEG-1; BIC-1 | FLO-1            | HET-1A           | Normal;<br>Barrett      | Induction of glutathione s-transferase-pi in Barrett metaplasia and Barrett adenocarcinoma cell lines                                                                          |
| Soldes et al.   | 1999 | SEG-1; BIC-1 | FLO-1            | HET-1A           | Barrett; EAC            | Differential expression of Hsp27 in normal oesophagus, Barrett metaplasia and oesophageal adenocarcinomas                                                                      |
| Schrump et al.  | 1998 | SK-GT-5      | SK-GT-4; SK-GT-2 | HCE-4            |                         | Flavopiridol mediates cell cycle arrest and apoptosis in esophageal cancer cells                                                                                               |
| Hughes et al.   | 1997 | SEG-1; BIC-1 | FLO-1            |                  | EAC                     | Fas/APO-1 (CD95) is not translocated to the cell membrane in esophageal adenocarcinoma                                                                                         |

\* Also cell line(s) from other species or cancer types were used. EAC, Esophageal adenocarcinoma; ESCC, Esophageal squamous cell carcinoma; GAC, Gastric adenocarcinoma. Esophagus related cell lines are HET-1A (Non-cancer derived, SV40 immortalized squamous epithelial cell line established by Harris et al.); hTERT NSE (hTERT immortalized squamous epithelial cell line established by Spechler et al.); CP-A; CP-C; CP-D (hTRT immortalized Barrett esophagus derived cell lines established by Rabinovitch et al.). Esophageal squamous cell carcinoma cell lines are the KYSE-series; TE-series; OE21; H5E973; HCE-4.

† Also SEG-1 xenografts were used.

‡ Cell lines H80-T; L20-T established by Beer et al. do not grow in vitro (personal communication). Cell line BA-1 established by dr Rutten does not grow in vitro and origin is unknown (personal communication). Cell line TE-7 is not an esophageal adenocarcinoma cell line, but a squamous cell carcinoma cell line of unknown origin (as reported by Boonstra et al.)
